# Supplementary material for: Homogeneous photochemical water oxidation with metal salophen complexes in neutral media
Source: Royal Society of Chemistry journal article supplement (doi:10.1039/c9pp00254e), 2019-10-01
Supplement: c9pp00254e1.pdf [file c9pp00254e1.pdf]

## SUPPORTING INFORMATION

### **Homogeneous photochemical water oxidation with metal salophen complexes in neutral media**

Md. Ali Asraf,<sup>ad</sup> Chizoba I. Ezugwu,<sup>a</sup> C. M. Zakaria<sup>d</sup> and Francis Verpoort<sup>\*abc</sup>

<sup>a</sup> *Laboratory of Organometallics, Catalysis and Ordered Materials, State Key Laboratory of Advanced Technology for Materials Synthesis and Processing, Wuhan University of Technology, Wuhan 430070, China. E-mail: [Francis.Verpoort@ghent.ac.kr](mailto:Francis.Verpoort@ghent.ac.kr), Tel.: +86 15071172245; Fax: +86 2787879468*

<sup>b</sup> *National Research Tomsk Polytechnic University, Lenin Avenue 30, 634050 Tomsk, Russian Federation.*

<sup>c</sup> *Ghent University, Global Campus Songdo, 119 Songdomunhwa-Ro, Yeonsu-Gu, Incheon, Korea.*

<sup>d</sup> *Department of Chemistry, Rajshahi University, Rajshahi-6205, Bangladesh.*

#### **Contents:**

Figure S1: <sup>1</sup>H-NMR spectrum of the salophen ligand, **S1p**

Figure S2: <sup>13</sup>C-NMR spectrum of the salophen ligand, **S1p**

Figure S3: FT-IR spectrum of the salophen ligand, **S1p**

Figure S4: <sup>1</sup>H-NMR spectrum of the salophen Ni(II) complex, **1**

Figure S5: <sup>13</sup>C-NMR spectrum of the salophen Ni(II) complex, **1**

Figure S6: FT-IR spectrum of the salophen Ni(II) complex, **1**

Figure S7: FT-IR spectrum of the salophen Cu(II) complex, **2**

Figure S8: FT-IR spectrum of the salophen Mn(II) complex, **3**

This report was created by ACD/NMR Processor Academic Edition. For more information go to [www.acdlabs.com/nmrproc/](http://www.acdlabs.com/nmrproc/) 3/30/2015 1:16:12 PM

|                        |                      |                      |                         |                        |                      |
|------------------------|----------------------|----------------------|-------------------------|------------------------|----------------------|
| Acquisition Time (sec) | 3.2768               | Comment              | salophen                | Date                   | 28 Nov 2014 01:27:28 |
| Date Stamp             | 28 Nov 2014 01:27:28 | File Name            | D:\NMR data\slp\slp.fid | Frequency (MHz)        | 500.20               |
| Nucleus                | <sup>1</sup> H       | Number of Transients | 16                      | Origin                 | spect                |
| Original Points Count  | 32768                | Pulse Sequence       | zg30                    | Receiver Gain          | 94.75                |
| Points Count           | 32768                | Spectrum Type        | STANDARD                | Sweep Width (Hz)       | 10000.00             |
| Spectrum Offset (Hz)   | 3088.9392            |                      |                         | Solvent                | DMSO-d6              |
|                        |                      |                      |                         | Temperature (degree C) | 27.202               |

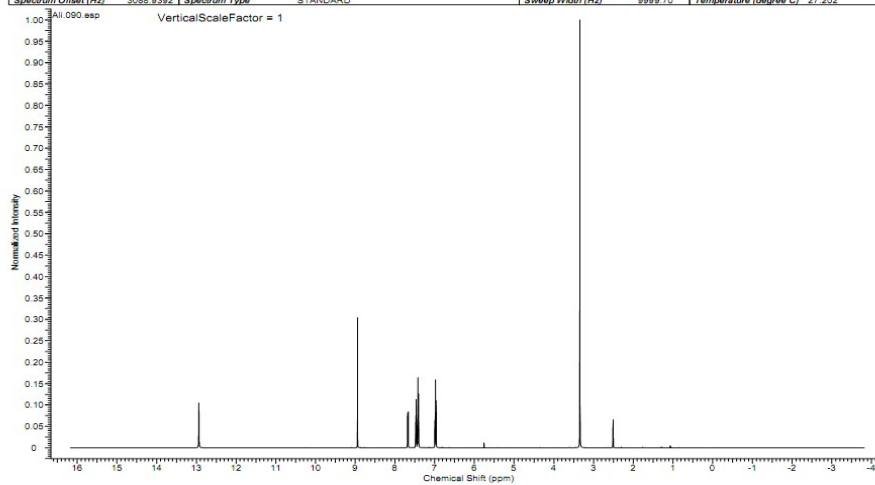

Figure S1: <sup>1</sup>H-NMR spectrum of the salophen ligand, Slp

This report was created by ACD/NMR Processor Academic Edition. For more information go to [www.acdlabs.com/nmrproc/](http://www.acdlabs.com/nmrproc/) 4/1/2015 11:13:41 AM

|                        |                      |                      |                                       |                        |                      |
|------------------------|----------------------|----------------------|---------------------------------------|------------------------|----------------------|
| Acquisition Time (sec) | 1.1010               | Comment              | Slp                                   | Date                   | 26 Mar 2015 09:42:24 |
| Date Stamp             | 26 Mar 2015 09:42:24 | File Name            | D:\NMR data\NMR data for Slp\2015.fid | Frequency (MHz)        | 125.78               |
| Nucleus                | <sup>13</sup> C      | Number of Transients | 1024                                  | Origin                 | spect                |
| Original Points Count  | 32768                | Owner                | nmr                                   | Points Count           | 32768                |
| Receiver Gain          | 190.40               | Sweep Width (Hz)     | 20761.90                              | Pulse Sequence         | zgpg30               |
| Spectrum Type          | STANDARD             |                      |                                       | Solvent                | DMSO-d6              |
|                        |                      |                      |                                       | Spectrum Offset (Hz)   | 12578.9844           |
|                        |                      |                      |                                       | Temperature (degree C) | 27.199               |

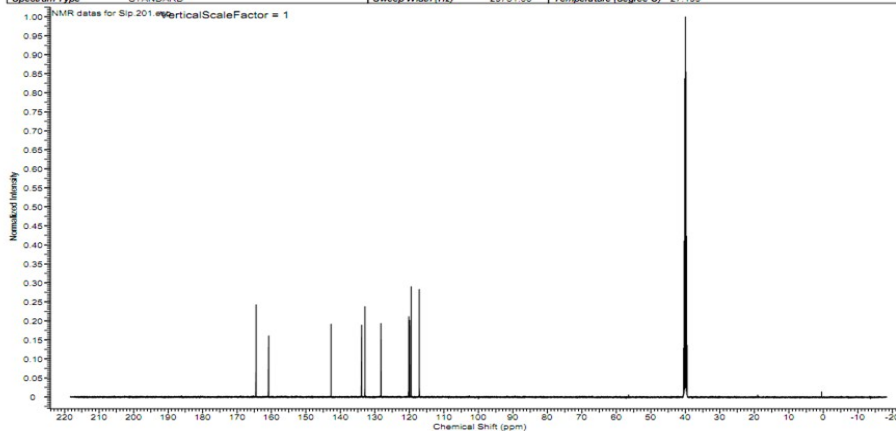

Figure S2: <sup>13</sup>C-NMR spectrum of the salophen ligand, Slp

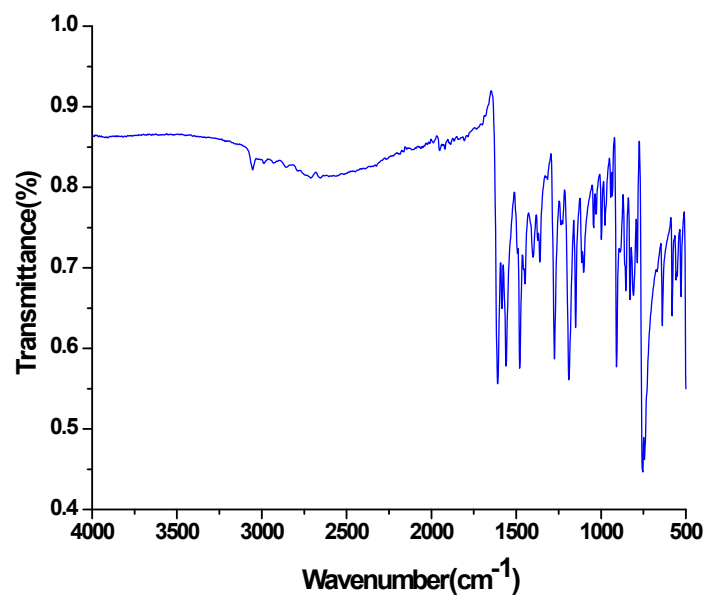

Figure S3: FT-IR spectrum of the salophen ligand, Slp

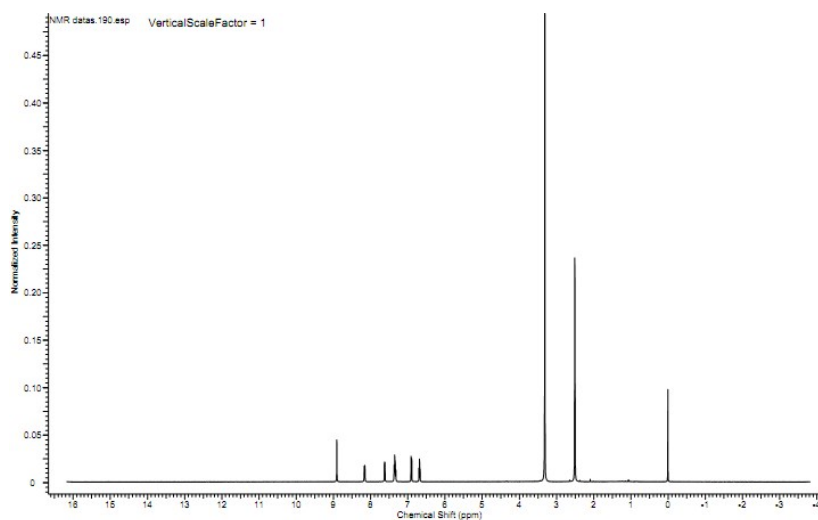

Figure S4:  $^1\text{H}$ -NMR spectrum of the salophen Ni(II) complex, 1

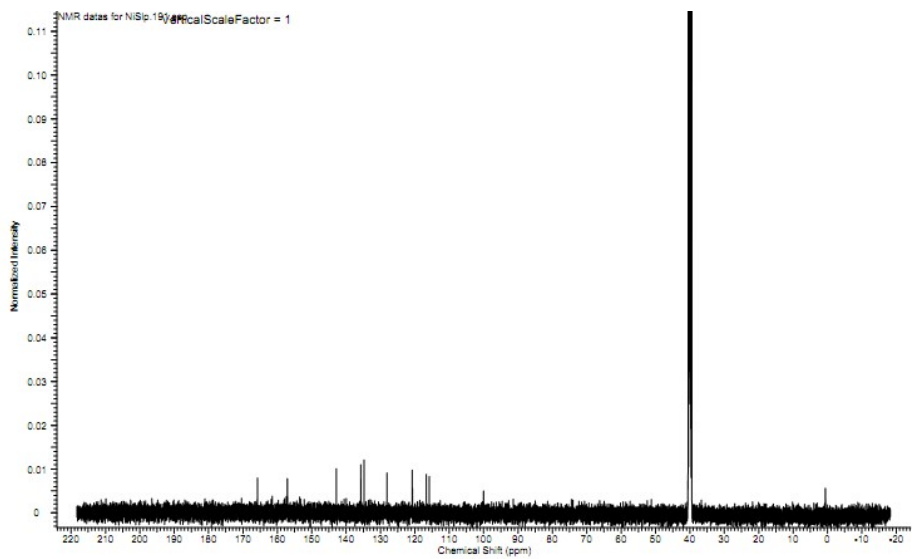

Figure S5:  $^{13}\text{C}$ -NMR spectrum of the salophen Ni(II) complex, 1

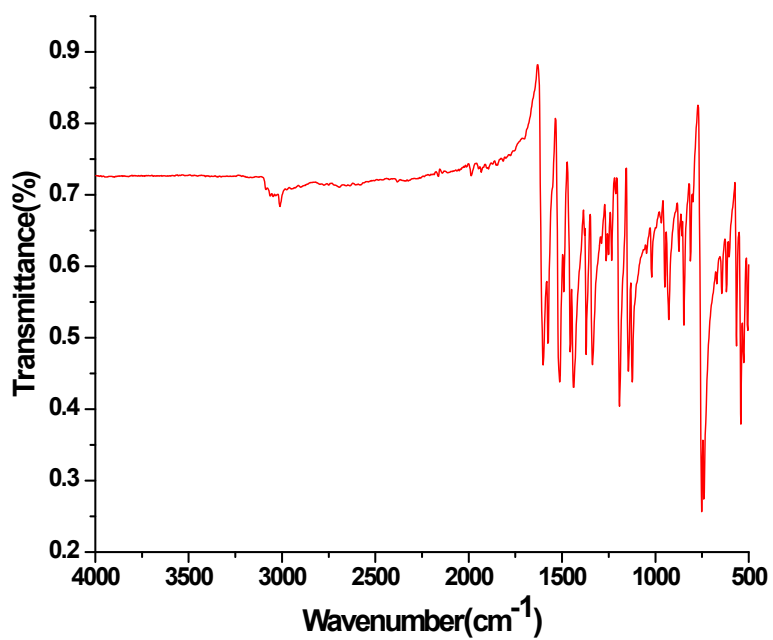

Figure S6: FT-IR spectrum of the salophen Ni(II) complex, 1

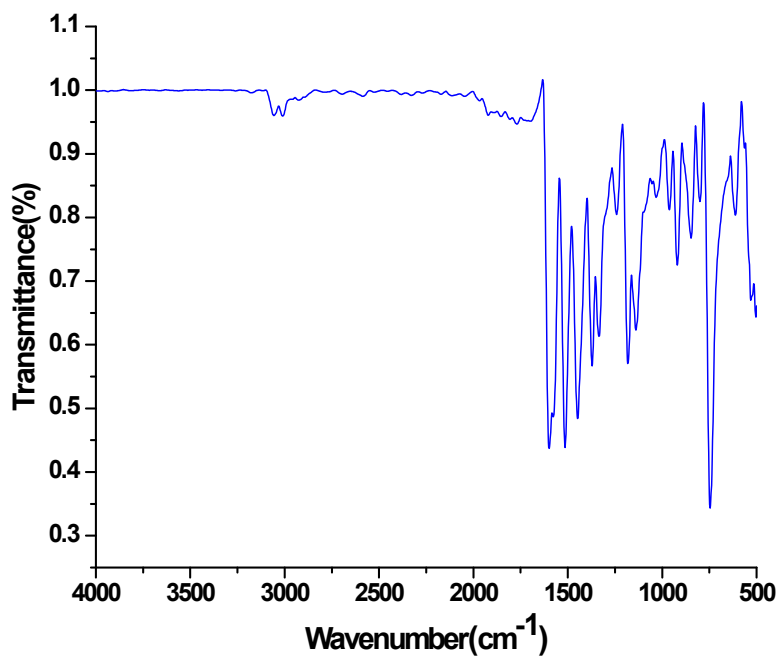

Figure S7: FT-IR spectrum of the salophen Cu(II) complex, 2

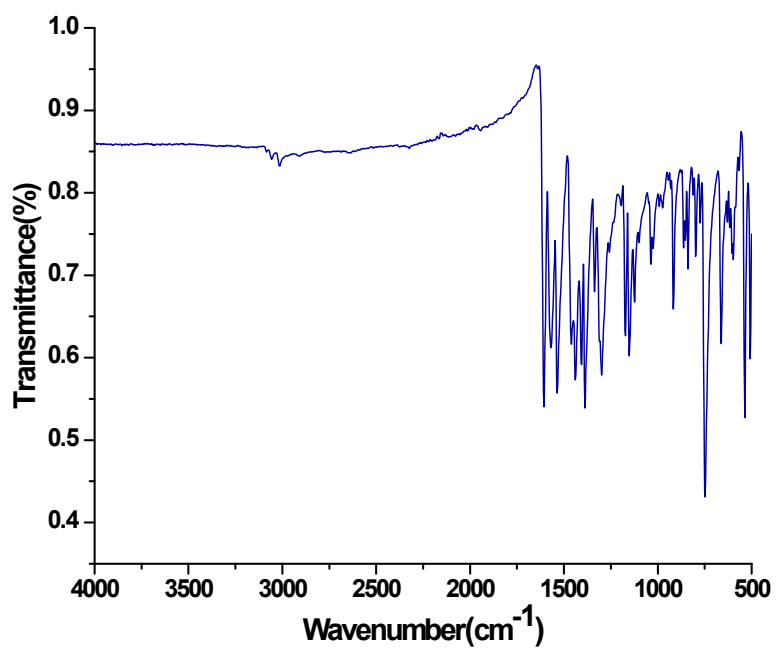

Figure S8: FT-IR spectrum of the salophen Mn(II) complex, 3
